# Supplementary material for: Body Dysmorphic Disorder and Major Depressive Episode Have Comorbidity-Independent Associations With Suicidality in an Acute Psychiatric Setting
Source: Atypon-hosted journal article supplement (doi:10.1176/appi.focus.19405), 2021-10-01
Supplement: appi.focus.19405.ds001.pdf [file appi.focus.19405.ds001.pdf]

## **Supplementary Materials**

Snorrason, I., Beard, C., Christensen, K., Bjornsson, A.S., & Björgvinsson, T.  
Body Dysmorphic Disorder and Major Depressive Episode have Comorbidity-Independent  
Associations with Suicidality in an Acute Psychiatric Setting.  
Journal of Affective Disorders

**Table S1**

Summary of Logistic Regression: Psychiatric Disorders Predicting Non-Suicidal Self-Injury in Partial Hospital Program

|                                                    | <i>n</i> (%) | Bivariate <sup>a</sup><br>OR (95% CI) | <i>p</i> | Multivariate <sup>a</sup><br>OR (95% CI) | <i>p</i> |
|----------------------------------------------------|--------------|---------------------------------------|----------|------------------------------------------|----------|
| <b><u>Non-Suicidal Self-Injury<sup>b</sup></u></b> |              |                                       |          |                                          |          |
| Major Depressive Episode                           | 57 (19.4)    | 2.51 (1.38-4.56)                      | .003     | 2.28 (1.19-4.39)                         | .013     |
| -Unipolar Depression                               | 38 (17.4)    | 1.32 (0.78-2.22)                      | .306     | 1.35 (0.77-2.38)                         | .296     |
| -Bipolar Depression                                | 18 (25.7)    | 2.49 (1.31-4.73)                      | .005     | 2.16 (1.04-4.51)                         | .040     |
| Panic Disorder                                     | 20 (22.2)    | 1.33 (0.73-2.42)                      | .361     | 1.52 (0.66-3.49)                         | .325     |
| Agoraphobia                                        | 13 (20.3)    | 1.00 (0.49-2.02)                      | .994     | 0.66 (0.25-1.75)                         | .400     |
| Social Anxiety Disorder                            | 31 (19.6)    | 1.16 (0.68-1.99)                      | .596     | 0.84 (0.46-1.55)                         | .585     |
| Obsessive-Compulsive Disorder                      | 18 (20.7)    | 1.26 (0.68-2.35)                      | .461     | 0.95 (0.47-1.94)                         | .892     |
| Posttraumatic Stress Disorder                      | 12 (21.1)    | 1.23 (0.59-2.57)                      | .577     | 1.04 (0.47-2.33)                         | .922     |
| Generalized Anxiety Disorder                       | 35 (16.9)    | 1.18 (0.69-2.02)                      | .541     | 1.10 (0.61-1.98)                         | .742     |
| Body Dysmorphic Disorder                           | 11 (31.4)    | 2.19 (0.99-4.88)                      | .054     | 2.29 (0.98-5.35)                         | .056     |

<sup>a</sup>Adjusted for age and gender. <sup>b</sup>Non-suicidal Self-Injury in past month=assessed with a single item from the Columbia Suicide Severity Rating Scale. (A total of 15.5% of the sample reported a non-suicidal self-injury). OR=odds ratio, CI=confidence interval.

**Table S2**

Demographic and Clinical Variables among Excluded and Included Patients

|                               | Excluded<br>Patients<br>( <i>n</i> =169) | Study<br>Sample<br>( <i>n</i> =498) | <i>t</i> or $\chi^2$ | <i>p</i> |
|-------------------------------|------------------------------------------|-------------------------------------|----------------------|----------|
| <b><u>Demographics</u></b>    |                                          |                                     |                      |          |
| Age, M(SD)                    | 36.27 (14.38)                            | 34.82 (14.46)                       | 1.12                 | .264     |
| Gender, % Female              | 53.3                                     | 55.2                                | .20                  | .657     |
| Race, % White                 | 84.6                                     | 87.3                                | .82                  | .366     |
| Ethnicity, % non-Hispanic     | 96.2                                     | 94.1                                | .99                  | .319     |
| <b><u>BASIS-24®</u></b>       |                                          |                                     |                      |          |
| Depression Functioning, M(SD) | 2.22 (1.05)                              | 2.28 (.95)                          | -.62                 | .538     |
| Relationships, M(SD)          | 1.55 (.93)                               | 1.33 (.84)                          | 2.56                 | .011     |
| Self-Harm, M(SD)              | .71 (.94)                                | .68 (.89)                           | .45                  | .656     |
| Emotional Lability, M(SD)     | 1.66 (1.06)                              | 1.63 (1.00)                         | .40                  | .688     |
| Psychosis, M(SD)              | .62 (.86)                                | .39 (.65)                           | 3.04                 | .003     |
| Substance Abuse, M(SD)        | .43 (.69)                                | .52 (.70)                           | -1.47                | .142     |
| Total Score, M(SD)            | 1.65 (.72)                               | 1.63 (.63)                          | .24                  | .811     |

M=mean, SD=standard deviation, BASIS-24®=The 24-item Behavior and Symptom Identification Scale (Eisen et al., 2004. The Revised Behavior and Symptom Identification Scale (BASIS-R): reliability and validity. Med. Care. 42, 1230-41).
